# Supplementary material
Source: Springer Nature journal article supplement (https://www.springermedizin.de/resource/supplementary/12888_2007_227_MOESM3_ESM.pdf/9482232)
Supplement: MOESM3 [file 9482232]

Additional file 3: Individual adverse events

| Study                                 | Drug comparison                              | Method of collection                          | Category reported                                 | Somnolence                         | Weight gain                                 | Increased appetite      | Headache                           | Dry mouth               | Nervousness              | Asthenia                 | Anxiety                  | Depression                                   | Insomnia                 | Diarrhoea                | Nausea                   | Vomiting |
|---------------------------------------|----------------------------------------------|-----------------------------------------------|---------------------------------------------------|------------------------------------|---------------------------------------------|-------------------------|------------------------------------|-------------------------|--------------------------|--------------------------|--------------------------|----------------------------------------------|--------------------------|--------------------------|--------------------------|----------|
| <b>Mania/mixed: less than 6 weeks</b> |                                              |                                               |                                                   |                                    |                                             |                         |                                    |                         |                          |                          |                          |                                              |                          |                          |                          |          |
| Segal et al. 1998                     | risperidone v lithium v haloperidol          | Documented                                    | not reported                                      |                                    |                                             |                         |                                    |                         |                          |                          |                          |                                              |                          |                          |                          |          |
| Tohen et al. 1999                     | olanzapine v placebo                         | no information                                | in ≥10% of group or stat sig between-group diff   | (1) 23/70<br>(2) 12/69             | (1) 8/70<br>(1) 1/69                        |                         | (1) 12/70<br>(2) 11/69             | (1) 18/70<br>(2) 6/69   | (1) 6/70<br>(2) 9/69     | (1) 13/70<br>(2) 16/69   | (1) 10/70<br>(2) 7/69    | (1) 9/70<br>(2) 8/69                         |                          |                          |                          |          |
| Berk et al. 1999                      | olanzapine v lithium                         | Noted                                         | not reported                                      |                                    |                                             |                         |                                    |                         |                          |                          |                          |                                              |                          |                          |                          |          |
| Tohen et al. 2000                     | olanzapine v placebo                         | Assessed                                      | in ≥10% of group or stat sig between-group diff   | (1) 21/55<br>(2) 5/60              | sig larger mean weight gain for olanzapine  |                         | (1) 10/55<br>(2) 13/60             | (1) 9/55<br>(2) 3/55    | (1) 5/55<br>(2) 12/60    | (1) 6/55<br>(2) 3/60     | (1) 2/55<br>(2) 9/60     |                                              |                          |                          |                          |          |
| Tohen et al. 2002                     | olanzapine v divalproex                      | Monitored                                     | in ≥10% of group or stat sig between-group diff   | (1) 49/125<br>(2) 26/126           | (1) 15/125<br>(2) 10/126                    | (1) 15/125<br>(2) 3/126 | (1) 28/125<br>(2) 29/126           | (1) 42/125<br>(2) 8/126 | (1) 13/125<br>(2) 21/126 | (1) 20/125<br>(2) 17/126 |                          | sleep disorder<br>(1) 7/125<br>(2) 1/126     | (1) 8/125<br>(2) 17/126  | (1) 13/125<br>(2) 36/126 | (1) 10/125<br>(2) 18/126 |          |
| Hirschfeld et al. 2004                | risperidone v placebo                        | General and directed questioning              | in ≥10% of group                                  | (1) 38/134<br>(2) 9/125            |                                             |                         | (1) 19/134<br>(2) 19/125           |                         |                          |                          |                          |                                              |                          |                          | (1) 15/134<br>(2) 3/125  |          |
| Yatham et al. 2003                    | risperidone+MS v placebo+MS                  | no information                                | most frequent                                     |                                    | sig larger mean weight gain for risperidone |                         | (1) 9%<br>(2) 9%                   |                         |                          |                          |                          | given antidepressant<br>(1) 1/75<br>(2) 2/75 | (1) 4%<br>(2) 8%         |                          | (1) 5%<br>(2) 3%         |          |
| Sachs et al. 2002                     | risperidone+MS v haloperidol+MS v placebo+MS | Obtained                                      | in ≥10% of group                                  | (1) 13/52<br>(2) 16/53<br>(3) 6/51 | sig larger mean weight gain for risperidone |                         | (1) 11/52<br>(2) 8/53<br>(3) 12/51 |                         |                          |                          |                          |                                              |                          |                          |                          |          |
| Sachs et al. 2004                     | quetiapine+MS v placebo+MS                   | Examination and questioning every study day   | in ≥10% of group                                  | (1) 36/90<br>(2) 10/100            |                                             |                         | (1) 24/90<br>(2) 21/100            | (1) 17/90<br>(2) 4/100  |                          | (1) 10/90<br>(2) 3/100   |                          |                                              |                          |                          |                          |          |
| Yatham et al. 2004                    | quetiapine+MS v placebo+MS                   | Examination, patient reports, medical records | in ≥5% of group (1) and x2 incidence in group (2) | (1) 66/196<br>(2) 19/203           | (1) 12/196<br>(2) 5/203                     |                         |                                    | (1) 38/196<br>(2) 6/203 |                          | (1) 19/196<br>(2) 8/203  |                          |                                              |                          |                          |                          |          |
| Keck et al. 2003                      | ziprasidone v placebo                        | Observed or reported                          | in ≥10% of group                                  | (1) 52/140<br>(2) 9/70             | no sig diff                                 |                         | (1) 30/140<br>(2) 13/70            |                         |                          |                          |                          | (1) 11/140<br>(2) 7/70                       |                          | (1) 16/140<br>(2) 7/70   |                          |          |
| Keck et al. 2003b                     | aripiprazole v placebo                       | Obtained                                      | in ≥10% of group                                  | (1) 26/127<br>(2) 6/127            |                                             |                         | (1) 46/127<br>(2) 40/127           |                         |                          |                          | (1) 23/127<br>(2) 13/127 | (1) 19/127<br>(2) 11/127                     | (1) 15/127<br>(2) 11/127 | (1) 29/127<br>(2) 13/127 | (1) 20/127<br>(2) 6/127  |          |
| Potkin et al. 2005                    | ziprasidone v placebo                        | Observed or volunteered                       | T-R in ≥5% of group                               | (1) 31/139<br>(2) 4/66             |                                             |                         | (1) 17/139<br>(2) 5/66             |                         |                          | (1) 7/139<br>(2) 1/66    |                          |                                              |                          | (1) 9/139<br>(2) 1/66    |                          |          |

|                                |                                     |                                                                                |                                                 |                                     |                                    |             |                                    |                                    |                         |                          |                                   |  |                                    |                                       |                                   |                                   |                                   |                          |
|--------------------------------|-------------------------------------|--------------------------------------------------------------------------------|-------------------------------------------------|-------------------------------------|------------------------------------|-------------|------------------------------------|------------------------------------|-------------------------|--------------------------|-----------------------------------|--|------------------------------------|---------------------------------------|-----------------------------------|-----------------------------------|-----------------------------------|--------------------------|
| Khanna et al. 2005             | risperidone v placebo               | no information                                                                 | in ≥10% of group                                |                                     |                                    | no sig diff |                                    |                                    |                         |                          |                                   |  |                                    |                                       |                                   |                                   |                                   | (1) 9/146<br>(2) 14/144  |
| Smulevich et al. 2005          | risperidone v haloperidol v placebo | Monitored and assessed                                                         | in ≥10% of active treatment groups              | (1) 7/154<br>(2) 5/144<br>(3) 2/140 |                                    |             |                                    |                                    |                         |                          |                                   |  |                                    |                                       |                                   |                                   |                                   |                          |
| Sachs et al. 2006              | aripiprazole v placebo              | Obtained and measured                                                          | in ≥10% of group                                | (1) 27/136<br>(2) 14/133            |                                    |             | (1) 34/136<br>(2) 33/133           |                                    |                         |                          | (1) 14/136<br>(2) 11/133          |  |                                    | (1) 9/136<br>(2) 13/133               | (1) 29/136<br>(2) 21/133          | (1) 15/136<br>(2) 10/133          |                                   |                          |
| <b>Mania/mixed: 6-12 weeks</b> |                                     |                                                                                |                                                 |                                     |                                    |             |                                    |                                    |                         |                          |                                   |  |                                    |                                       |                                   |                                   |                                   |                          |
| Tohen et al. 2002b             | olanzapine+MS v placebo+MS          | no information                                                                 | in ≥10% of group or stat sig between-group diff | (1) 118/229<br>(2) 31/115           | (1) 60/229<br>(2) 8/115            |             | (1) 54/229<br>(2) 9/115            | (1) 36/229<br>(2) 21/115           | (1) 73/229<br>(2) 9/115 | (1) 24/229<br>(2) 17/115 | (1) 42/229<br>(2) 15/115          |  | (1) 41/229<br>(2) 20/115           |                                       |                                   |                                   |                                   | (1) 27/229<br>(2) 17/115 |
| Zajack et al. 2002             | olanzapine v divalproex             | spontaneous reports and monitoring                                             | stat sig diff between groups                    | (1) 27/57<br>(2) 18/63              | (1) 14/57<br>(2) 6/63              |             |                                    |                                    |                         |                          |                                   |  |                                    |                                       |                                   |                                   |                                   |                          |
| Tohen et al. 2003              | olanzapine v haloperidol            | non-directed, open-ended questioning, spontaneous report, clinical observation | in ≥10% of group                                | (1) 35/234<br>(2) 19/219            | (1) 32/234<br>(2) 9/219            |             |                                    |                                    |                         |                          |                                   |  |                                    |                                       |                                   |                                   |                                   |                          |
| Bowden et al. 2005             | quetiapine v placebo v lithium      | questioning and examination                                                    | in ≥5% of group                                 | (1) 21/107<br>(2) 3/97<br>(3) 9/98  | (1) 16/107<br>(2) 1/97<br>(3) 6/98 |             | (1) 8/107<br>(2) 4/97<br>(3) 12/98 | (1) 26/107<br>(2) 2/97<br>(3) 6/98 |                         |                          | (1) 7/107<br>(2) 1/97<br>(3) 4/98 |  | (1) 6/107<br>(2) 1/97<br>(3) 1/98  | (1) 10/107<br>(2) 20/97<br>(3) 16/98  | (1) 5/107<br>(2) 4/97<br>(3) 5/98 | (1) 1/107<br>(2) 2/97<br>(3) 6/98 | (1) 1/107<br>(2) 2/97<br>(3) 6/98 |                          |
| McIntyre et al. 2005           | quetiapine v placebo v haloperidol  | open-ended questioning, spontaneous report, clinical observation               | in ≥5% of active treatment groups               | (1) 13/102<br>(2) 5/101<br>(3) 9/99 |                                    |             | (1) 5/102<br>(2) 4/101<br>(3) 8/99 | (1) 7/102<br>(2) 4/101<br>(3) 4/99 |                         |                          |                                   |  | (1) 2/102<br>(2) 4/101<br>(3) 1/99 | (1) 20/102<br>(2) 20/101<br>(3) 14/99 |                                   |                                   |                                   |                          |

|                      |                            |                               |                     |  |                                        |                          |  |  |  |  |  |                          |  |  |
|----------------------|----------------------------|-------------------------------|---------------------|--|----------------------------------------|--------------------------|--|--|--|--|--|--------------------------|--|--|
| Vieta et al.<br>2005 | aripiprazole v haloperidol | reports gathered,<br>measured | in ≥10% of<br>group |  | small mean<br>changes, not<br>sig diff | (1) 19/174<br>(2) 20/172 |  |  |  |  |  | (1) 24/175<br>(2) 12/172 |  |  |
|----------------------|----------------------------|-------------------------------|---------------------|--|----------------------------------------|--------------------------|--|--|--|--|--|--------------------------|--|--|

---

**Mania/mixed: more than 12 weeks**

|                       |                         |          |                                                           |                          |                          |                         |                          |                         |                          |                                                   |                          |                          |                                                   |                                |
|-----------------------|-------------------------|----------|-----------------------------------------------------------|--------------------------|--------------------------|-------------------------|--------------------------|-------------------------|--------------------------|---------------------------------------------------|--------------------------|--------------------------|---------------------------------------------------|--------------------------------|
| Tohen et al.<br>2003b | olanzapine v divalproex | Assessed | in ≥10% of<br>group or stat<br>sig between-<br>group diff | (1) 58/125<br>(2) 31/126 | (1) 31/125<br>(2) 15/126 | (1) 17/125<br>(2) 7/126 | (1) 33/125<br>(2) 34/126 | (1) 43/125<br>(2) 9/126 | (1) 15/125<br>(2) 28/126 | (1) 29/125 (1)<br>(2) 23/126 16/125<br>(2) 22/126 | (1) 43/125<br>(3) 38/126 | (1) 10/125<br>(2) 20/126 | (1) 13/125 (1)<br>(2) 24/126 20/125<br>(2) 40/126 | (1)<br>17/125<br>(2)<br>23/126 |
|-----------------------|-------------------------|----------|-----------------------------------------------------------|--------------------------|--------------------------|-------------------------|--------------------------|-------------------------|--------------------------|---------------------------------------------------|--------------------------|--------------------------|---------------------------------------------------|--------------------------------|

|                      |                               |                |                     |                       |                       |  |  |  |  |                      |                      |                        |                       |                      |
|----------------------|-------------------------------|----------------|---------------------|-----------------------|-----------------------|--|--|--|--|----------------------|----------------------|------------------------|-----------------------|----------------------|
| Tohen et al.<br>2004 | olanzapine+MS v<br>placebo+MS | no information | in ≥10% of<br>group | (1) 10/51<br>(2) 4/48 | (1) 10/51<br>(2) 3/48 |  |  |  |  | (1) 5/51<br>(2) 6/48 | (1) 7/51<br>(2) 7/48 | (1) 19/51<br>(2) 14/48 | (1) 2/51<br>(2) 13/48 | (1) 5/51<br>(2) 8/48 |
|----------------------|-------------------------------|----------------|---------------------|-----------------------|-----------------------|--|--|--|--|----------------------|----------------------|------------------------|-----------------------|----------------------|

|                      |                      |          |                                         |                                      |            |  |  |                         |  |                                |                          |                          |  |                        |
|----------------------|----------------------|----------|-----------------------------------------|--------------------------------------|------------|--|--|-------------------------|--|--------------------------------|--------------------------|--------------------------|--|------------------------|
| Tohen et al.<br>2005 | olanzapine v lithium | Reported | in ≥5% of either<br>group [hypersomnia] | (1) 14/217<br>(1) 6/217<br>(2) 0/214 | (1) 10/214 |  |  | (1) 9/217<br>(2) 11/214 |  | (1)<br>12/217<br>(2)<br>10/214 | (1) 45/217<br>(2) 25/214 | (1) 17/217<br>(2) 48/214 |  | (1) 1/217<br>(2) 8/214 |
|----------------------|----------------------|----------|-----------------------------------------|--------------------------------------|------------|--|--|-------------------------|--|--------------------------------|--------------------------|--------------------------|--|------------------------|

|                      |                      |                       |                                                     |                        |                         |                        |  |                        |  |  |  |  |                         |  |
|----------------------|----------------------|-----------------------|-----------------------------------------------------|------------------------|-------------------------|------------------------|--|------------------------|--|--|--|--|-------------------------|--|
| Tohen et al.<br>2006 | olanzapine v placebo | Spontaneous<br>report | in ≥10% of<br>group(most in<br>open label<br>phase) | (1) 6/225<br>(2) 2/136 | (1) 18/225<br>(2) 2/136 | (1) 4/225<br>(2) 0/136 |  | (1) 4/225<br>(2) 1/136 |  |  |  |  | (1) 5/225<br>(2) 19/136 |  |
|----------------------|----------------------|-----------------------|-----------------------------------------------------|------------------------|-------------------------|------------------------|--|------------------------|--|--|--|--|-------------------------|--|

|                     |                        |                                               |                        |                      |  |  |  |                       |                      |                      |                        |                       |                        |                      |
|---------------------|------------------------|-----------------------------------------------|------------------------|----------------------|--|--|--|-----------------------|----------------------|----------------------|------------------------|-----------------------|------------------------|----------------------|
| Keck et al.<br>2006 | aripiprazole v placebo | Asked about<br>adverse events<br>and observed | ≥5% in either<br>group | (1) 4/77<br>(2) 6/83 |  |  |  | (1) 6/77<br>(2) 13/83 | (1) 8/77<br>(2) 5/83 | (1) 6/77<br>(2) 7/83 | (1) 13/77<br>(2) 12/83 | (1) 9/77<br>(2) 12/83 | (1) 12/77<br>(2) 16/83 | (1) 7/77<br>(2) 4/83 |
|---------------------|------------------------|-----------------------------------------------|------------------------|----------------------|--|--|--|-----------------------|----------------------|----------------------|------------------------|-----------------------|------------------------|----------------------|

---

**Depression: 8-12 weeks**

|                       |                                                    |                       |                     |                                        |  |  |  |                                       |                                       |                                       |                                      |                                       |                                      |                                                                             |
|-----------------------|----------------------------------------------------|-----------------------|---------------------|----------------------------------------|--|--|--|---------------------------------------|---------------------------------------|---------------------------------------|--------------------------------------|---------------------------------------|--------------------------------------|-----------------------------------------------------------------------------|
| Tohen et al.<br>2003d | olanzapine v<br>olanzapine+fluoxetine v<br>placebo | Recorded,<br>assessed | in ≥10% of<br>group | (1) 104/351<br>(2) 18/82<br>(3) 47/355 |  |  |  | (1) 50/351<br>(2) 11/82<br>(3) 19/355 | (1) 46/351<br>(2) 12/82<br>(3) 70/355 | (1) 41/351<br>(2) 12/82<br>(3) 70/355 | (1) 39/351<br>(2) 8/82<br>(3) 30/355 | (1) 36/351<br>(2) 11/82<br>(3) 12/355 | (1) 31/351<br>(2) 8/82<br>(3) 57/355 | (1) 24/351 (1)<br>(2) 16/82 16/351<br>(3) 25/355 (2) 10/82<br>(3)<br>33/355 |
|-----------------------|----------------------------------------------------|-----------------------|---------------------|----------------------------------------|--|--|--|---------------------------------------|---------------------------------------|---------------------------------------|--------------------------------------|---------------------------------------|--------------------------------------|-----------------------------------------------------------------------------|

|                        |                                                 |               |                                |                                  |                                  |                                  |                                  |                                  |  |                                  |  |                                  |                                  |                                  |
|------------------------|-------------------------------------------------|---------------|--------------------------------|----------------------------------|----------------------------------|----------------------------------|----------------------------------|----------------------------------|--|----------------------------------|--|----------------------------------|----------------------------------|----------------------------------|
| Shelton et al.<br>2004 | risperidone v parox v<br>risperidone+paroxetine | not specified | all<br>{not all shown<br>here} | (1) 5/10<br>(2) 2/10<br>(3) 2/10 | (1) 1/10<br>(2) 1/10<br>(3) 4/10 | (1) 2/10<br>(2) 2/10<br>(3) 2/10 | (1) 1/10<br>(2) 1/10<br>(3) 0/10 | (1) 1/10<br>(2) 3/10<br>(3) 1/10 |  | (1) 1/10<br>(2) 0/10<br>(3) 0/10 |  | (1) 0/10<br>(2) 2/10<br>(3) 1/10 | (1) 2/10<br>(3) 3/10<br>(3) 1/10 | (1) 0/10<br>(2) 2/10<br>(3) 0/10 |
|------------------------|-------------------------------------------------|---------------|--------------------------------|----------------------------------|----------------------------------|----------------------------------|----------------------------------|----------------------------------|--|----------------------------------|--|----------------------------------|----------------------------------|----------------------------------|

|                       |                                            |                       |                           |                                        |                         |                          |                                        |                                        |                         |                                                 |
|-----------------------|--------------------------------------------|-----------------------|---------------------------|----------------------------------------|-------------------------|--------------------------|----------------------------------------|----------------------------------------|-------------------------|-------------------------------------------------|
| Calabrese et al. 2005 | quetiapine600 v<br>quetiapine300 v placebo | Assessed              | in ≥10% of<br>group       | (1) 44/180<br>(2) 49/179<br>(3) 15/180 |                         |                          | (1) 18/180<br>(2) 22/179<br>(3) 36/180 | (1) 73/180<br>(2) 79/179<br>(3) 14/180 |                         | (1) 6/180<br>(2)<br>14/179<br>(3)<br>23/180     |
| Brown et al. 2006     | olanzapine+fluoxetine v<br>lamotrigine     | nonprobing<br>inquiry | In >5% of either<br>group | (1) 38/205<br>(2) 17/204               | (1) 29/205<br>(2) 4/204 | (1) 36/205<br>(2) 17/204 | (1) 24/205<br>(2) 19/204               | (1) 32/205<br>(2) 12/204               | (1) 9/205<br>(2) 18/204 | (1)<br>16/205<br>(2)<br>16/204                  |
| Thase et al. 2006     | quetiapine600 v<br>quetiapine300 v placebo | Evaluated             | in ≥10% of any<br>group   | (1) 50/168<br>(2) 51/171<br>(3) 8/167  |                         |                          | (1) 14/168<br>(2) 15/171<br>(3) 28/167 | (1) 79/168<br>(2) 73/171<br>(3) 30/167 |                         | (1)<br>18/168<br>(2)<br>13/171<br>(3)<br>22/167 |

EP = extrapyramidal;

| Dyspepsia                        | Constipation                     | Dizziness                                                             | Agitation                | Fatigue | Pain                                | Hostility            | Personality disorder | Pharyngitis             | Tongue oedema           | Postural hypotension | Accidental injury       | Prolactin                                              | Glucose                                            | Lipids                       | Extrapyramidal symptom related                                                                           |
|----------------------------------|----------------------------------|-----------------------------------------------------------------------|--------------------------|---------|-------------------------------------|----------------------|----------------------|-------------------------|-------------------------|----------------------|-------------------------|--------------------------------------------------------|----------------------------------------------------|------------------------------|----------------------------------------------------------------------------------------------------------|
|                                  | (1) 8/70<br>(2) 2/69             | (1) 16/70<br>(2) 4/69                                                 | (1) 13/70<br>(2) 16/69   |         | (1) 8/70<br>(2) 3/69                | (1) 6/70<br>(2) 8/69 | (1) 5/70<br>(2) 8/69 |                         |                         |                      |                         |                                                        |                                                    |                              |                                                                                                          |
| (2) 7/55<br>(2) 3/60             | (1) 6/55<br>(2) 5/60             | (1) 7/55<br>(2) 4/60                                                  | (1) 5/55<br>(2) 15/60    |         |                                     | (1) 1/55<br>(2) 6/60 | (1) 1/55<br>(2) 7/60 |                         |                         |                      |                         |                                                        |                                                    |                              |                                                                                                          |
| (1) 18/125<br>(2) 14/126         | (1) 18/125<br>(2) 15/126         | (1) 20/125<br>(2) 15/126                                              | (1) 14/125<br>(2) 14/126 |         | (1) 17/125<br>(2) 18/126            |                      |                      |                         | (1) 6/125<br>(2) 0/126  |                      |                         |                                                        |                                                    |                              | Tremor (1) 12/125 (2) 4/126<br>Neck rigidity (1) 9/125 (2) 2/126<br>Speech disorder (1) 10/125 (2) 1/126 |
| (1) 15/134<br>(2) 8/125          |                                  | (1) 15.134<br>(2) 11/125                                              |                          |         |                                     |                      |                      |                         |                         |                      |                         | sig inc in mean<br>for risperidone<br>group            | no sig diff                                        |                              | Hyperkinesia (1) 21/134 (2) 6/125<br><br>EP rel (1) 16/75 (2) 6/75                                       |
| (1) 9/52<br>(2) 9/53<br>(3) 9/51 | (1) 2/52<br>(2) 6/53<br>(3) 2/51 | (1) 7/52<br>(2) 4/53<br>(3) 1/51                                      |                          |         |                                     |                      |                      |                         |                         |                      |                         |                                                        |                                                    |                              | EP disorder (1) 7/52 (2) 15/53<br>(3) 2/51<br>Tremor (1) 2/52 (2) 6/53 (3) 2/51                          |
|                                  |                                  | (1) 9/90<br>(2) 6/100                                                 |                          |         |                                     |                      |                      |                         | (1) 10/90<br>(2) 3/100  |                      |                         |                                                        | no sig diff                                        |                              |                                                                                                          |
|                                  |                                  |                                                                       |                          |         |                                     |                      |                      | (1) 11/196<br>(2) 5/203 | (1) 13/196<br>(2) 3/203 |                      |                         |                                                        |                                                    |                              | E-P rel (1) 42/196 (2) 39/203<br>[Akathisia (1) 7/196 (2) 10/203]                                        |
| (1) 14/140<br>(2) 7/70           |                                  | (1) 38/140<br>(2) 7/70                                                |                          |         |                                     |                      |                      |                         |                         |                      |                         |                                                        |                                                    |                              | Akathisia (1) 15/140 (2) 4/70<br>Hypertonia (1) 16/140 (2) 2/70                                          |
| (1) 28/127<br>(2) 13/127         | (1) 17/127<br>(2) 7/127          | Lightheadedness<br>(1) 18/127<br>(2) 10/127<br>(1) 14/139<br>(2) 1/66 | (1) 25/127<br>(2) 24/127 |         | abbdominal<br>(1) 2/139<br>(2) 5/66 |                      |                      |                         |                         |                      | (1) 15/127<br>(2) 3/127 | above ULN:<br>(1) 14/127<br>(2) 22/127<br>both gps dec | no sig diff                                        | cholesterol - no<br>sig diff | Akathisia (1) 14/127 (2) 3/127<br>Tremor (1) 8/127 (2) 4/127                                             |
|                                  |                                  |                                                                       |                          |         |                                     |                      |                      |                         |                         |                      |                         |                                                        | elevated<br>triglycerides<br>(1) 8/139<br>(2) 7/66 |                              | EP syndrome (1) 15/139 (2) 1/66<br>Akathisia (1) 13/139 (2) 3/66<br>Tremor (1) 11/139 (2) 1/66           |

|                         |                                    |                                    |                                      |                                                                                                |                                                                                                 |                                                                                     |                                                                                                                                                                                                                                                                                               |
|-------------------------|------------------------------------|------------------------------------|--------------------------------------|------------------------------------------------------------------------------------------------|-------------------------------------------------------------------------------------------------|-------------------------------------------------------------------------------------|-----------------------------------------------------------------------------------------------------------------------------------------------------------------------------------------------------------------------------------------------------------------------------------------------|
| (1) 21/136<br>(2) 9/133 | (1) 16/136<br>(2) 7/133            | (1) 20/136<br>(2) 19/133           | extremity<br>(1) 14/136<br>(2) 7/133 | inc in<br>risperidone<br>group                                                                 |                                                                                                 |                                                                                     | EP disorder (1) 51/146 (2) 9/145<br>Tremor (1) 15/146 (2) 1/145<br>Dystonia (1) 7/146 (2) 0/145<br>Hyperkinesia (1) 1/146 (2) 0/145                                                                                                                                                           |
|                         |                                    |                                    |                                      | inc in both<br>active groups,<br>more in<br>risperidone                                        |                                                                                                 |                                                                                     | EP disorder (1) 26/154 (2) 58/144 (3) 12/140<br>Hyperkinesia (1) 14/154 (2) 22/144 (3) 4/140<br>Tremor (1) 10/154 (2) 16/144 (3) 8/140<br>Hypertonia (1) 6/154 (2) 13/144 (3) 0/140                                                                                                           |
|                         |                                    |                                    |                                      | dec in both<br>groups, stat<br>greater with<br>aripiprazole<br>≥ULN<br>(1) 5/136<br>(2) 15/133 | no clinically sig<br>diff                                                                       | no clinically sig<br>diff                                                           | Akathisia (1) 24/136 (2) 6/133                                                                                                                                                                                                                                                                |
|                         | (1) 31/229<br>(2) 8/115            |                                    |                                      | >ULN<br>(1) 43/229<br>(2) 5/115                                                                | no sig diff                                                                                     |                                                                                     | Tremor (1) 53/229 (2) 15/115<br>Speech disorder (1) 15/229 (2) 1/115                                                                                                                                                                                                                          |
|                         |                                    |                                    | Oedema<br>(1) 8/57<br>(2) 0/63       |                                                                                                | no sig diff<br>overall, but one<br>olanzapine<br>patient died<br>from diabetic<br>ketoacidosis  | cholesterol- sig<br>increase in<br>mean total and<br>LDL for<br>olanzapine<br>group | Speech disorder (1) 4/57 (2) 0/63                                                                                                                                                                                                                                                             |
|                         |                                    |                                    |                                      | <200 to ≥200<br>mg/dl<br>(1) 3/209<br>(2) 4/194                                                |                                                                                                 | cholesterol<br><200 to ≥240<br>mg/dl<br>(1) 9/134<br>(2) 8/133                      | Akathisia (1) 15/234 (2) 65/219<br>Tremor (1) 13/234 (2) 34/219<br>Hypertonia (1) 12/234 (2) 39/219<br>EP syndrome (1) 5/234 (2) 52/219<br>Dystonia (1) 3/234 (2) 15/219<br>Dyskinesia (1) 1/234 (2) 7/219<br>Hypokinesia [sic] (1) 1/234 (2) 8/219<br>Tardive dyskinesia (1) 0/234 (2) 5/219 |
|                         | (1) 13/107<br>(2) 2/97<br>(3) 7/98 |                                    |                                      | Mean levels<br>high at baseline<br>Shift to >ULN:<br>(1) 6/53<br>(2) 6/47<br>(3) 7/55          | no clinically<br>important<br>differences                                                       |                                                                                     | Tremor (1) 6/107 (2) 4/97 (3) 18/98<br>Akathisia (1) 1/107 (2) 6/97 (2) 3/98                                                                                                                                                                                                                  |
|                         |                                    | (1) 8/102<br>(2) 9/101<br>(3) 8/99 |                                      | (1) 6/102<br>(2) 1/101<br>(3) 2/99                                                             | Mean levels<br>high at<br>baseline, dec in<br>all groups, but<br>more in<br>quetiapine<br>group |                                                                                     | EPS-rel (1) 13/102 (2) 16/101 (3) 59/99<br>Tremor (1) 8/102 (2) 6/101 (3) 30/99<br>Akathisia (1) 6/102 (2) 6/101 (3) 33/99<br>EP syndrome (1) 6/102 (2) 6/101 (3) 35/99                                                                                                                       |

>ULN  
 (1) 25/175  
 (2) 97/169  
 Mean dec in (1)  
 and inc in (2)

cholesterol -no  
 clin meaningful  
 diff

EP rel (1) 42/175 (2) 108/172  
 EP syndrome (1) 16/175 (2) 61/172  
 Tremor (1) 12/175 (2) 17/169  
 Akathisia (1) 20/175 (2) 40/169

|                          |                          |                          |                            |                          |                         |                                                      |                                                               |                                                                                           |                                                                                         |
|--------------------------|--------------------------|--------------------------|----------------------------|--------------------------|-------------------------|------------------------------------------------------|---------------------------------------------------------------|-------------------------------------------------------------------------------------------|-----------------------------------------------------------------------------------------|
| (1) 21/125<br>(2) 19/126 | (1) 19/125<br>(2) 19/126 | (1) 23/125<br>(2) 21/126 | (1) 20/125<br>(2) 17/126   | (1) 23/125<br>(2) 27/126 | (1)13/125<br>(2) 14/126 | abnormally high<br>glucose<br>(1) 0/113<br>(2) 0/114 | abnormally high<br>cholesterol<br>(1) 1/118<br>(2) 0/115      | Akathisia (1) 12/125 (2) 2/126<br>Tremor (1) 15/125 (2) 14/126                            |                                                                                         |
|                          |                          |                          | (1)<br>14/225<br>(2) 2/136 |                          |                         | prolactin<br>measured but<br>not reported            | No case of clin<br>relevant inc<br>(<11.1 to ≥11.1<br>mmol/l) | cholesterol - no<br>case of clin<br>relevant inc<br>(<5.17 mmol/l<br>to ≥ 6.20<br>mmol/l) | Tremor (1) 7/51 (2) 4/48                                                                |
|                          |                          |                          |                            |                          |                         |                                                      | <200 to ≥200<br>mg/dl<br>(1) 8/206<br>(2) 2/198               | cholesterol<br><200 to ≥240<br>mg/dl<br>(1) 4/54<br>(2) 1/55                              | not reported                                                                            |
|                          |                          |                          |                            |                          |                         | (1) 12/104<br>(2) 2/64                               | <200 to ≥200<br>mg/dl<br>(1) 3/206<br>(2) 2/122               | cholesterol<br><200 to ≥240<br>mg/dl<br>(1) 2/64<br>(2) 0/45                              | not reported                                                                            |
|                          |                          | (1) 6/77<br>(2) 9/83     |                            | (1) 7/77<br>(2) 6/83     |                         | (1) mean dec<br>(2) mean dec<br>diff just sig        | no sig diff<br>betseen groups                                 | no sig diff<br>between<br>groups                                                          | Akathisia (1) 5/77 (2) 1/83<br>Tremor (1) 7/77 (2) 1/83<br>Hypertonia (1) 3/77 (2) 1/83 |

≥30 mm Hg  
dec in syst BP  
(1) 5/346  
(2) 6/82  
(3) 5/352

no data

Mean changes  
sig greater in  
both olanzapine  
groups (4 to 6  
mg/dl)  
<200 to ≥200  
mg/dl:  
(1) 4/289  
(2) 1/65  
(3) 1/298

Cholesterol -  
mean baseline  
levels high, with  
inc in both  
olanzapine  
groups (6 to 10  
mg/dl)

|                                  |                                  |                                  |                                  |
|----------------------------------|----------------------------------|----------------------------------|----------------------------------|
| (1) 1/10<br>(2) 0/10<br>(3) 0/10 | (1) 0/10<br>(2) 1/10<br>(3) 1/10 | (1) 0/10<br>(2) 0/10<br>(3) 1/10 | (1) 2/10<br>(2) 2/10<br>(3) 1/10 |
|----------------------------------|----------------------------------|----------------------------------|----------------------------------|

no data      no data      no data

(1) 20/180  
(2) 21/179  
(3) 8/180

(1) 41/180  
(2) 30/179  
(3) 15/180

(1) 28/205  
(2) 16/204

(1)  
17/205  
(2) 11/204

(1) 17/168  
(2) 14/171  
(3) 5/167

(1) 27/168  
(2) 24/171  
(3) 9/167

(1)  
19/168  
(2)  
16/171  
(3)  
13/167

no clinically relevant differences between groups in mean changes from baseline inc in mean from baseline with (1) but not (2)

no clinically relevant differences between groups in mean changes from baseline no sig diff in mean change from baseline

no clinically relevant differences between groups in mean changes from baseline Sig diff in mean change from baseline for cholesterol and triglycerides in favour of lamotrigine

EP-related (1) 16/180 (2) 12/179 (3) 4/180

Tremor (1) 22/205 (2) 3/204

No significant differences between groups in mean changes from baseline

EP symptoms (1) 17/168 (2) 21/171 (3) 11/167
